# Supplementary material
Source: PubMed Central journal article supplement (PMC2638429)
Supplement: ern136_1.pdf [file ern136_1.pdf]

**Transcriptome profiling of ripening nectarine (*Prunus persica* L. Batsch) fruit treated with 1-MCP. Fiorenza Ziliotto, Maura Begheldo, Angela Rasori, Claudio Bonghi, and Pietro Tonutti**

**SUPPLEMENTARY DATA**

**Table S1.** Primers (L: left and R: right) used for qRT-PCR analyses.

| <b>Gene</b>                                     | <b>Primer L/R</b>                                                    |
|-------------------------------------------------|----------------------------------------------------------------------|
| <i>AUX/IAA</i><br><i>Ctg_768</i>                | 5-CTGGATGTTAGTTGGAGACGTCCCTTGG-3<br>5-GTGGCAGAACCTGAGACGTCCTTGGAG -3 |
| <i>β carotene hydroxylase</i><br><i>Ctg_711</i> | 5-GCACGAGTCTCACCACCGACCCAGAG-3<br>5-TCCAAGACCAGCACCAAAACATAGGC-3     |
| <i>Catalase</i><br><i>Ctg_1024</i>              | 5-GATCCTGTTCGTCATGCTGAGCGCTAC-3<br>5-GCGCCCAAGATCTGTATCTCTCTCCA-3    |
| <i>ERF-like</i><br><i>Ctg_2757</i>              | 5-CGCATACATGGCTCCAAGGCTTTGCTC-3<br>5-CTGGGACAAAGGGAAGGCCGTCAC-3      |
| <i>ETR2</i><br><i>Ctg_4109</i>                  | 5-CTCATGAGGGAGAAGTTGGCCGAGC -3<br>5-GCCTCCTCATCCCATCACTCATTACC-3     |
| <i>TPPA</i><br><i>Ctg_4621</i>                  | 5-CCGCAATGTAGATGAGAAGAGTTGGCC-3<br>5- GTGACGGCCTTCCCTTTGTCCCAG -3    |
